# Supplementary material for: Health Effects of Carotenoids during Pregnancy and Lactation
Source: Nutrients. 2017 Aug 4;9(8):838. doi: 10.3390/nu9080838 (PMC5579631; doi:10.3390/nu9080838)
Supplement: Supplementary file 1 [file nutrients-09-00838-s001.pdf]

**Table S1.** Observational and intervention studies examining associations between carotenoids during pregnancy and maternal or infant health outcomes

| Study type                   | Study group                                                                                                                                                                     | Observation or intervention                                                                                                | Assessed outcome                                     | Results                                                                                                                                                                                                                                                                                                                      | Source |
|------------------------------|---------------------------------------------------------------------------------------------------------------------------------------------------------------------------------|----------------------------------------------------------------------------------------------------------------------------|------------------------------------------------------|------------------------------------------------------------------------------------------------------------------------------------------------------------------------------------------------------------------------------------------------------------------------------------------------------------------------------|--------|
| <b>Observational studies</b> |                                                                                                                                                                                 |                                                                                                                            |                                                      |                                                                                                                                                                                                                                                                                                                              |        |
| Prospective cohort study     | n=67 Norway, Australia, USA<br>nondiabetic (n=20) and 1 type diabetic (n=47)<br>31.7 ± 4.6y, 28.5 ± 5.6<br>non-Hispanic                                                         | maternal serum carotenoids ( $\alpha$ -C, $\beta$ -C, Ly, L <sup>1</sup> ) in 1, 2, 3 trimesters of pregnancy              | subsequent PE <sup>+2</sup>                          | - ↓ 45% $\alpha$ -C and 53% $\beta$ -C plasma concentrations t 3 trimester in PE+ diabetic compared with PE- <sup>3</sup> diabetic (p<0.05)                                                                                                                                                                                  | [49]   |
| Case-control study           | n=304 Peru<br>PE+ n=125, PE- n=179<br>26.6 ± 0.6y, -26.3 ± 0.5y<br>n=271 Inca Indian ancestry<br>n=48 <12 y of education                                                        | maternal serum carotenoids ( $\alpha$ -C, $\beta$ -C, Ly, L, Z, $\beta$ -Cr <sup>4</sup> ) in 36.0 – 37.3 Hbd <sup>5</sup> | differences in carotenoids level between PE+ and PE- | - no differences                                                                                                                                                                                                                                                                                                             | [50]   |
| Case-control study           | n=359 Zimbabwe<br>PE+ n=173, PE- n=186<br>25.6 ± 6.4y, 26.6 ± 5.8y                                                                                                              | maternal serum carotenoids ( $\alpha$ -C, $\beta$ -C, Ly, L, Z, $\beta$ -Cr) at 12 – 72h postpartum                        | differences in carotenoids level between PE+ and PE- | ↓ 45%PE+ risk for women in the highest quartiles for $\alpha$ -C, $\beta$ -C, L, Z, $\beta$ -Cr:<br>- $\beta$ -C OR <sup>6</sup> 0.50 (95%CI <sup>7</sup> 0.25-1.00)<br>- $\alpha$ -C OR 0.53 (95%CI 0.26-1.05)<br>- $\beta$ -Cr OR 0.47 (95%CI 0.19-1.11)<br>- L OR 0.46 (95%CI 0.19-1.11)<br>- Z OR 0.48 (95%CI 0.20-1.16) | [41]   |
| Case-control study           | n=5337 Canada<br>PE+ n=111, PE- n=441<br>29.3 ± 5.7/5.4y<br>18 and 15% high school or less, 26 and 39% university graduate or more<br>75 and 82% North America/Europe/Australia | maternal serum carotenoids ( $\alpha$ -C, $\beta$ -C, Ly, L, $\beta$ -Cr, $\alpha$ -Cr <sup>8</sup> ) in 24 – 26 Hbd       | subsequent PE+                                       | ↓ PE+ risk:<br>- L OR 0.60 (95%CI 0.46-0.77)<br>- Ly OR 0.93 (95%CI 0.75-1.16)<br>- carotenoids OR 0.82 (95%CI 0.62-1.07)<br>- L OR 0.53 (95%CI 0.35-0.80) – early onset PE<br>- L OR 0.62 (95%CI 0.47-0.82) – late onset PE                                                                                                 | [48]   |

|                          |                                                                                                                                                                                                                                          |                                                                                                                                                      |                                             |                                                                                                                                                                                                                                                                                                         |      |
|--------------------------|------------------------------------------------------------------------------------------------------------------------------------------------------------------------------------------------------------------------------------------|------------------------------------------------------------------------------------------------------------------------------------------------------|---------------------------------------------|---------------------------------------------------------------------------------------------------------------------------------------------------------------------------------------------------------------------------------------------------------------------------------------------------------|------|
|                          | 5 and 11% family income<15000\$/y                                                                                                                                                                                                        |                                                                                                                                                      |                                             |                                                                                                                                                                                                                                                                                                         |      |
| Cohort study             | <p>n=23 423 Norway</p> <p>5.4% PE+</p> <p>&lt;20y 3.8, 20-29y 58.1%, 30-39y 37.2%, ≥40y 0.9%</p> <p>≤10y of education 4%, ≥16y 21%</p> <p>5.4% daily smokers</p>                                                                         | <p>dietary pattern at 17-22 Hbd (FFQ<sup>9</sup>)</p>                                                                                                | <p>subsequent PE+</p>                       | <p>↓ risk for dietary pattern rich in vegetables and fruits:</p> <p>- OR 0.72, 95%CI 0.62-0.85)</p>                                                                                                                                                                                                     | [51] |
| Case-control study       | <p>n=650</p> <p>n=207 preterm birth, n=443 term</p> <p>20-34y 78 and 83%</p> <p>high school or less education 14 and 18%</p> <p>family income per year &lt;15000 12 and 14%</p>                                                          | <p>maternal serum carotenoids (<math>\alpha</math>-C, <math>\beta</math>-C, Ly, L, <math>\beta</math>-Cr, <math>\alpha</math>-Cr) in 24 - 26 Hbd</p> | <p>subsequent spontaneous preterm birth</p> | <p>↓ risk for the highest quartile compared with the lowest:</p> <p>- <math>\beta</math>-C OR 0.4 (95%CI 0.2-0.7)</p> <p>- <math>\alpha</math> -C OR 0.5 (95%CI 0.3-0.9)</p> <p>- <math>\beta</math>-Cr OR 0.6 (95%CI 0.3-1.1)</p> <p>- L OR 0.6 (95%CI 0.4-1.1)</p> <p>- Ly OR 0.6 (95%CI 0.4-1.1)</p> | [65] |
| Case-control study       | <p>n=5738 USA</p> <p>n=471 preterm birth, n=5267 term</p> <p>26.21 ± 6.61, 27.55 ± 6.07</p> <p>46.6 – 59.6% Non-Hispanic white</p> <p>16-19% education &lt; high school</p> <p>15.5-25.5% smoking</p> <p>4-6.9% gestational diabetes</p> | <p>maternal dietary intake year before pregnancy</p>                                                                                                 | <p>subsequent preterm birth</p>             | <p>↑ risk for the lowest quartile compared with the highest:</p> <p>- <math>\beta</math>-C OR 1.9 (95%CI 1.1-1.7) - 32-34 Hbd</p> <p>- <math>\alpha</math> -C OR 1.4 (95%CI 1.1-1.9) – 35-36 Hbd</p>                                                                                                    | [66] |
| Prospective cohort study | <p>n=66000 Norway</p> <p>5.3% preterm birth</p>                                                                                                                                                                                          | <p>dietary pattern during pregnancy (FFQ)</p>                                                                                                        | <p>subsequent preterm birth</p>             | <p>↓ risk for the prudent dietary pattern (rich in vegetables and fruits):</p> <p>- HR<sup>10</sup> 0.88 (95%CI 0.80-0.97)</p>                                                                                                                                                                          | [67] |

|                          |                                                                                                                                                                                                                                                                                                 |                                                                    |                  |                                                                           |      |
|--------------------------|-------------------------------------------------------------------------------------------------------------------------------------------------------------------------------------------------------------------------------------------------------------------------------------------------|--------------------------------------------------------------------|------------------|---------------------------------------------------------------------------|------|
|                          | 52.5%, ≥40y 2.0% <20y 1.0, 20-29y 44.5%, 30-39y<br><13y of education 31%, ≥17y 25%<br>5.4% daily smokers<br>singleton pregnancies                                                                                                                                                               |                                                                    |                  |                                                                           |      |
| Case-control study       | n=996 Canada<br>n=324 SGA <sup>11</sup> , n=672 controls<br>29.01 ± 5.74 – 29.07 ± 5.16y<br>19.8 and 15.5% high school or less, 35.5 and 38.1% university graduate or more<br>76.9 and 79.9% North America/Europe/Australia<br>13.6 and 10.9% family income<15000\$/y<br>15.3 and 26.9% smokers | maternal serum carotenoids (β-C, Ly, L, β-Cr, α-Cr) in 24 - 26 Hbd | risk of SGA      | - Ly OR 0.89 (95%CI 0.77-1.03)<br>- carotenoids OR 0.64 (95%CI 0.54-0.78) | [70] |
| Cross-sectional study    | n=200 Germany<br>32.3 ± 5.0 y<br><br>no data about maternal characteristic<br>Weeks of labour 39.1 ± 1.5                                                                                                                                                                                        | maternal serum carotenoids (α-C, β-C, Ly, L, Z, β-Cr) at delivery  | birth parameters | - no associations                                                         | [69] |
| Prospective cohort study | N=251 Poland<br>28.26 ± 3.72 y<br>64% education beyond high school<br>21.5% environmental cigarette smoke exposure<br>Weeks of labour 39.61 ± 1.2                                                                                                                                               | maternal serum carotenoids (α-C, β-C, Ly, L, Z, β-Cr) at delivery  | birth parameters | - no associations                                                         | [72] |

|                                   |                                                                                                                    |                                                                                              |                                                                 |                                                                                                                                                                                                                                                                                                                      |       |
|-----------------------------------|--------------------------------------------------------------------------------------------------------------------|----------------------------------------------------------------------------------------------|-----------------------------------------------------------------|----------------------------------------------------------------------------------------------------------------------------------------------------------------------------------------------------------------------------------------------------------------------------------------------------------------------|-------|
| Retrospective observational study | Italy n=24<br>gestational diabetes mellitus, insulin therapy<br><br>no data about maternal characteristic          | 10mg L +2mg Z/d (n=12) since 28 <sup>th</sup> Hbd for delivery vs. no supplementation (n=12) | oxidative stress in mother and newborn (TH <sup>12</sup> value) | <ul style="list-style-type: none"> <li>- no difference in maternal oxidative stress</li> <li>- ↓ oxidative stress at 2 h of life in infants (26.5 ± 5.74 vs. 60.4 ± 21.6 TH value, p=0.01)</li> <li>- no difference in oxidative stress at 48-60 h of life (71.0 ± 27.2 vs. 74.1 ± 24.8 TH value, p=0.84)</li> </ul> | [62]  |
| <b>Intervention studies</b>       |                                                                                                                    |                                                                                              |                                                                 |                                                                                                                                                                                                                                                                                                                      |       |
| RCT                               | India n=251<br>low-risk, healthy<br>21.8 - 22.6 y<br>8.6 – 9.3 y of education<br>singleton pregnancy               | 2mg Ly/d (n=116) since 16-20 Hbd for delivery vs. placebo (n=135)                            | subsequent PE+, fetal outcomes                                  | <ul style="list-style-type: none"> <li>- ↓ PE+ (8.6 vs 17.7% cases, p=0,043)</li> <li>- ↓ incidence of IUGR<sup>13</sup> (12% vs. 23.7%, p=0.033)</li> <li>- ↑ birth weight (2751.2 ± 315.8 vs. 2657.3 ± 444.3, p=0.049)</li> <li>- ↑ gestation weeks (37.7 ± 1.6 vs. 36.6 ± 2.2, p&lt;0.05)</li> </ul>              | [55]  |
| RCT                               | India n=159<br>low-risk, healthy<br>24.2 – 24.6 y<br>singleton pregnancy                                           | 2mg Ly/d (n=77) vs. placebo (n=82) since 12-20 Hbd for delivery                              | subsequent PE+, fetal and maternal outcomes                     | <ul style="list-style-type: none"> <li>- no differences in PE+</li> <li>- gestational weeks</li> <li>- birth weight</li> <li>- ↑ incidence of preterm labour (10.4% vs. 1.22, p=0.02)</li> <li>- ↑ incidence of low birth weight (22.1% vs. 9,8%, p=0.05)</li> </ul>                                                 | [ 56] |
| RCT                               | n=44 India<br>high-risk of PE+,<br>18-23y n=26, 24-28y n=10, >28y n=8,<br>singleton and multiple (n=3) pregnancies | 2mg Ly/d (n=20) vs. no supplementation (n=24)                                                | subsequent PE+ development, fetal outcomes                      | <ul style="list-style-type: none"> <li>- no differences in PE+</li> <li>- ↓ incidence of IUGR (5% vs. 33.3%, p=0.027)</li> </ul>                                                                                                                                                                                     | [57]  |

|     |                               |                                                                                                                                           |                                         |                              |       |
|-----|-------------------------------|-------------------------------------------------------------------------------------------------------------------------------------------|-----------------------------------------|------------------------------|-------|
|     |                               | since 14-28 Hbd for delivery                                                                                                              |                                         |                              |       |
| RCT | N=13709 Bangladesh Rural area | vitamin A 7000 µg<br>Res <sup>14</sup> /d<br>vs.<br>β-C 42mg/d (7000 µg REs/d)<br>vs.<br>placebo<br>since 1 trimester for 3 mo postpartum | pregnancy duration and birth parameters | - no significant differences | [ 73] |

<sup>1</sup> - α-C - α-carotene, β-C - β-carotene, Ly - lycopene, L - lutein; <sup>2</sup>PE+ – with preeclampsia; <sup>3</sup>PE- – without preeclampsia; <sup>4</sup>Z – zeaxanthin,, β-Cr - β-cryptoxanthin; <sup>5</sup>Hbd – week of gestation; <sup>6</sup>OR – odds ratio; <sup>7</sup>CI - confidence interval; <sup>8</sup>α-Cr - α- cryptoxanthin; <sup>9</sup>FFQ – Food Frequency Questionnaire; <sup>10</sup>HR – hazard ratio; <sup>11</sup>SGA – small for gestational age; <sup>12</sup>TH – total hydroperoxides; <sup>13</sup>IUGR – Intrauterine Growth Restriction; <sup>14</sup>REs – retinol equivalents.
